# Supplementary material
Source: PubMed Central journal article supplement (PMC9152665)
Supplement: 41581_2022_586_MOESM1_ESM.pdf [file 41581_2022_586_MOESM1_ESM.pdf]

---

**Supplementary information**

---

**Extracellular vesicles in kidney disease**

---

In the format provided by the  
authors and unedited

**Supplementary Table 1 | Therapeutic use of extracellular vesicle in animal models of kidney damage.**

| Extracellular vesicle origin | Model                         | Type of injury | Dose                                                       | Effects                                                                                          | Refs |
|------------------------------|-------------------------------|----------------|------------------------------------------------------------|--------------------------------------------------------------------------------------------------|------|
| <b>MSCs</b>                  |                               |                |                                                            |                                                                                                  |      |
| Bone Marrow                  | Glycerol                      | AKI            | Single injection: 15 µg<br>2.2x10 <sup>8</sup> EVs         | Stimulation of tubular epithelial cells proliferation and apoptosis resistance                   | 1, 2 |
|                              | IRI                           | AKI            | Single injection:<br>5 × 10 <sup>10</sup> EVs              | Delivery of miR-199a-3p with Sema3A downregulation and AKT and ERK pathways activation           | 3    |
|                              | Cisplatin                     | AKI            | Single injection:<br>100 µg                                | Anti-apoptotic effect, by up-regulating anti-apoptotic genes                                     | 4    |
|                              | Gentamicin                    | AKI            | Single injection:<br>100 µg                                | Anti-inflammatory effect                                                                         | 5    |
|                              | IRI                           | AKI            | Single injection:<br>200 µg                                | Anti-inflammatory effect; CCR2 EVs acting as decoy receptor to suppress CCL2 activity            | 6    |
|                              | Cisplatin                     | CKD            | Multiple injections: 100 µg followed by 50 µg every 4 days | Anti-apoptotic effect by up-regulating anti-apoptotic genes                                      | 4    |
|                              | Remnant kidney                | CKD            | Single injection:<br>30 µg                                 | Inhibition of fibrosis, interstitial lymphocyte infiltration and tubular atrophy                 | 7    |
|                              | UUO                           | CKD            | Single injection:<br>30 µg                                 | Decrease of serum creatinine and BUN                                                             | 8    |
|                              | UUO                           | CKD            | Single: 0.5 mg/kg                                          | Inhibition of fibrosis, by inhibiting the RhoA/ROCK pathway                                      | 9    |
|                              | Type 1 diabetes               | CKD            | Multiple injections: 1x10 <sup>10</sup> EVs                | Inhibition of fibrosis, via EV miRNA cargo                                                       | 10   |
|                              | Type 1 diabetes               | CKD            | Single injection:<br>100 µg/Kg                             | Induction of autophagy by increase of LC3 and Beclin-1 and decrease of mTOR and fibrotic markers | 11   |
|                              | Aristolochic acid nephropathy | CKD            | Multiple injections: 1x10 <sup>10</sup> EVs                | Inhibition of pro-fibrotic genes $\alpha$ -Sma, Tgfb1, and Colla1                                | 12   |
| Human umbilical cord         | Cisplatin                     | AKI            | Single injection:<br>200 µg                                | Amelioration of oxidative stress and cell apoptosis, promotion of proliferation                  | 13   |
|                              | IRI                           | AKI            | Single injection:<br>30 µg                                 | Induction of HGF synthesis that facilitates cell dedifferentiation and growth                    | 14   |
|                              | UUO                           | CKD            | Multiple injections: 200 µg (10mg/Kg)                      | Attenuation of fibrosis through inhibition of YAP activity by CK1 $\delta$ / $\beta$ -TRCP       | 15   |
|                              | Sepsis/ cecal ligation        | AKI            | Single injection:<br>100 µg                                | Anti-inflammatory effect by miR-146b up-regulation and NF- $\kappa$ B activity inhibition        | 16   |
| Wharton Jelly-               | IRI                           | AKI            | Single injection:<br>100 µg                                | Anti-inflammatory effect through suppression of CX3CL1                                           | 17   |
|                              | IRI                           | AKI            | Single injection:<br>100 µg                                | Inhibition of mitochondrial fission via miR-30                                                   | 18   |
|                              | Cyclosporine A                | CKD            | Multiple injections: 100 µg                                | Anti-oxidative property by inhibition of $\alpha$ -sma and ROS generation                        | 19   |

|                                             |                                              |         |                                                                    |                                                                                                                                                    |          |
|---------------------------------------------|----------------------------------------------|---------|--------------------------------------------------------------------|----------------------------------------------------------------------------------------------------------------------------------------------------|----------|
| Renal                                       | IRI                                          | AKI     | Single injection:<br>2x10 <sup>7</sup> EVs                         | Pro-angiogenic effect with increase of peritubular capillaries and amelioration of microvascular rarefaction                                       | 20       |
|                                             | IRI                                          | AKI     | Single injection:<br>4x10 <sup>8</sup> EVs                         | Stimulation of tubular proliferation                                                                                                               | 21       |
| Liver (HLSCs)                               | Aristolochic acid nephropathy                | CKD     | Multiple injections: 1x10 <sup>10</sup> EVs                        | Inhibition of fibrosis by reducing of pro-fibrotic genes $\alpha$ -Sma, Tgfb1, and Colla1                                                          | 22       |
|                                             | Type 1 diabetes                              | CKD     | Multiple injections: 1x10 <sup>10</sup> EVs                        | Inhibition of fibrosis via miRNA transfer                                                                                                          | 10       |
| Adipose tissue                              | Metabolic syndrome and renal artery stenosis | CKD     | Single injection:<br>1x10 <sup>10</sup> EVs                        | Anti-inflammatory effect <sup>84,85</sup> ; increase of T reg population <sup>85</sup>                                                             | 23<br>24 |
|                                             | Cisplatin                                    | AKI     | Double injections:<br>100 $\mu$ g                                  | Inhibition of apoptosis and inflammation by modulating Wnt/ TGF- $\beta$ , and epithelial–mesenchymal transition signaling pathways.               | 25       |
|                                             | Sepsis/ cecal ligation                       | AKI     | Single injection:<br>100 $\mu$ g                                   | Inhibition of inflammation and apoptosis through SIRT1 signaling pathway                                                                           | 26       |
|                                             | DOCA-salt hypertension                       | CKD     | Multiple injections:<br>1.5x10 <sup>9</sup> EVs                    | Anti-inflammatory effect                                                                                                                           | 27       |
|                                             | Spontaneous diabetes mice                    | CKD     | Multiple injections                                                | Promotion of autophagy flux and inhibition of apoptosis <sup>93</sup> ;<br>Amelioration of podocyte damage by transfer of miR-26a-5p <sup>94</sup> | 28<br>29 |
| Embryonic                                   | Remnant kidney                               | CKD     | Multiple injections: 7 $\mu$ g twice daily for 4 consecutive days  | Reduction of tubular and glomerular damage                                                                                                         | 30       |
| Human placenta                              | IRI                                          | AKI     | Multiple injections: 100 $\mu$ g                                   | Promotion of renal regeneration by Sox9+ cell activation                                                                                           | 31       |
| <b>EPCs</b>                                 |                                              |         |                                                                    |                                                                                                                                                    |          |
|                                             | IRI                                          | AKI/CKD | Single injection:<br>30 $\mu$ g                                    | Promotion of renal regeneration by reprogramming hypoxic resident renal cells                                                                      | 32       |
|                                             | Thy1.1 glomerulonephritis                    | AKI     | Single injection:<br>30 $\mu$ g                                    | Inhibition of antibody- and complement-mediated injury of mesangial cells                                                                          | 33       |
| <b>ECFCs</b>                                |                                              |         |                                                                    |                                                                                                                                                    |          |
|                                             | IRI                                          | AKI     | Single injection:<br>15 $\mu$ g<br>Single injection:<br>20 $\mu$ g | Inhibition of endothelial cell apoptosis <sup>82</sup> ;<br>Renal protection via transfer of miR-486-5p targeting PTEN <sup>83</sup>               | 34-36    |
| <b>Human-induced pluripotent stem cells</b> |                                              |         |                                                                    |                                                                                                                                                    |          |
| hiPSC-MSCs                                  | IRI                                          | AKI     | Single injection:<br>1x10 <sup>12</sup> EVs                        | Anti-necroptosis effect via delivering SP1                                                                                                         | 37       |
| hiPSCs                                      | IRI                                          | AKI     | Single injection:<br>1x10 <sup>9</sup> EVs                         | Reduction of cell death and inflammatory                                                                                                           | 38       |
| <b>Embryonic stem cells</b>                 |                                              |         |                                                                    |                                                                                                                                                    |          |
| ESC line                                    | IRI                                          | AKI     | Double injections:<br>100 $\mu$ g                                  | Stimulation of proliferation and angiogenesis, inhibition of renal fibrosis                                                                        | 39       |
| <b>Renal tubular cells</b>                  |                                              |         |                                                                    |                                                                                                                                                    |          |

|                           |                                             |     |                                            |                                                                                                                                    |    |
|---------------------------|---------------------------------------------|-----|--------------------------------------------|------------------------------------------------------------------------------------------------------------------------------------|----|
| Kidney                    | IRI                                         | AKI | Double injections:<br>100 µg               | Reduction of tubular damage, neutrophil infiltration and fibrosis                                                                  | 40 |
| <b>Urine</b>              |                                             |     |                                            |                                                                                                                                    |    |
| Urine                     | Glycerol                                    | AKI | Single injection:<br>2x10 <sup>8</sup> EVs | Stimulation of tubular cell proliferation, reduction of inflammatory and injury markers, and restoration of endogenous Klotho loss | 41 |
| <b>Urine-derived MSCs</b> |                                             |     |                                            |                                                                                                                                    |    |
| Urine                     | streptozotocin induced-diabetic nephropathy | CKD | Multiple injections: 100 µg                | Inhibition of podocyte apoptosis and promotion of vascular regeneration                                                            | 42 |

Studies administering extracellular vesicles, released by different sources, in models of AKI and CKD are listed, with the different modalities of administration and dosage. MSCs: mesenchymal stromal cells; EPCs: endothelial progenitor cells; ECFCs: endothelial colony forming cells; HLSCs: human liver stem cells; UUO: obstruction of the ureter; IRI: ischemia reperfusion injury; hiPSCs: human-induced pluripotent stem cells; ESCs: embryonic stem cells.

## References

1. Bruno, S., et al. Mesenchymal stem cell-derived microvesicles protect against acute tubular injury. *J. Am. Soc. Nephrol.* **20**, 1053-1067 (2009).
2. Collino, F., et al. AKI recovery induced by mesenchymal stromal cell-derived extracellular vesicles carrying microRNA. *J. Am. Soc. Nephrol.* **26**, 2349-2360 (2015).
3. Zhu, G., et al. Exosomes from human-bone-marrow-derived mesenchymal stem cells protect against renal ischemia/reperfusion injury via transferring miR-199a-3p. *J. Cell. Physiol.* **234**, 23736-23749 (2019).
4. Bruno, S., et al. Microvesicles derived from mesenchymal stem cells enhance survival in a lethal model of acute kidney injury. *PLoS One* **7**, e33115 (2012).
5. Reis, L.A., Borges, F.T., Simões, M.J., Borges, A.A., Sinigaglia-Coimbra, R. & Schor, N. Bone marrow-derived mesenchymal stem cells repaired but did not prevent gentamicin-induced acute kidney injury through paracrine effects in rats. *PLoS One* **7**, e44092 (2012).
6. Shen, B., et al. CCR2 Positive Exosome Released by Mesenchymal Stem Cells Suppresses Macrophage Functions and Alleviates Ischemia/Reperfusion-Induced Renal Injury. *Stem Cells Int.* 1240301 (2016).
7. He, J., et al. Bone marrow stem cells-derived microvesicles protect against renal injury in the mouse remnant kidney model. *Nephrology (Carlton)* **17**, 493-500 (2012).

8. He, J., et al. Micro-vesicles derived from bone marrow stem cells protect the kidney both in vivo and in vitro by microRNA-dependent repairing. *Nephrology (Carlton)* 20, 591-600 (2015).
9. Shi, Z., Wang, Q., Zhang, Y. & Jiang, D. Extracellular vesicles produced by bone marrow mesenchymal stem cells attenuate renal fibrosis, in part by inhibiting the RhoA/ROCK pathway, in a UUO rat model. *Stem Cell Res. Ther.* 11, 253 (2020).
10. Grange, C., et al. Stem cell-derived extracellular vesicles inhibit and revert fibrosis progression in a mouse model of diabetic nephropathy. *Sci. Rep.* 9, 4468 (2019).
11. Ebrahim, N., et al. Mesenchymal stem cell-derived exosomes ameliorated diabetic nephropathy by autophagy induction through the mTOR signaling pathway. *Cells* 7, 226 (2018).
12. Kholia, S., et al. Mesenchymal Stem Cell Derived Extracellular Vesicles Ameliorate Kidney Injury in Aristolochic Acid Nephropathy. *Front. Cell Dev. Biol.* 8, 188 (2020).
13. Zhou, Y., et al. Exosomes released by human umbilical cord mesenchymal stem cells protect against cisplatin-induced renal oxidative stress and apoptosis in vivo and in vitro. *Stem Cell Res. Ther.* 4, 34 (2013).
14. Ju, G.Q., et al. Microvesicles derived from human umbilical cord mesenchymal stem cells facilitate tubular epithelial cell dedifferentiation and growth via hepatocyte growth factor induction. *PLoS One* 10, e0121534 (2015).
15. Ji C., et al. Exosomes derived from hucMSC attenuate renal fibrosis through CK1 $\delta$ / $\beta$ -TRCP-mediated YAP degradation. *Cell Death Dis.* 11, 327 (2020).
16. Zhang, R., et al. Human umbilical cord mesenchymal stem cell exosomes alleviate sepsis-associated acute kidney injury via regulating microRNA-146b expression. *Biotechnol. Lett.* 42, 669-679 (2020).

17. Zou, X., et al. Microvesicles derived from human Wharton's Jelly mesenchymal stromal cells ameliorate renal ischemia-reperfusion injury in rats by suppressing CX3CL1. *Stem Cell Res. Ther.* **5**, 40 (2014).
18. Gu, D., Zou, X., Ju, G., Zhang, G., Bao, E. & Zhu, Y. Mesenchymal Stromal Cells Derived Extracellular Vesicles Ameliorate Acute Renal Ischemia Reperfusion Injury by Inhibition of Mitochondrial Fission through miR-30. *Stem Cells Int.* 2093940 (2016).
19. Zhang, G.Y., et al. Extracellular-vesicles derived from human Wharton-Jelly mesenchymal stromal cells ameliorated cyclosporin A-induced renal fibrosis in rats. *Int. J. Clin. Exp. Med.* **12**, 8943-8949 (2019).
20. Choi, H.Y., et al. Microparticles from kidney-derived mesenchymal stem cells act as carriers of proangiogenic signals and contribute to recovery from acute kidney injury. *PLoS One* **9**, e87853 (2014).
21. Ranghino, A., et al. The effects of glomerular and tubular renal progenitors and derived extracellular vesicles on recovery from acute kidney injury. *Stem Cell Res. Ther.* **8**, 24 (2017).
22. Kholia, S., et al. Human Liver Stem Cell-Derived Extracellular Vesicles Prevent Aristolochic Acid-Induced Kidney Fibrosis. *Front. Immunol.* **9**, 1639 (2018).
23. Eirin, A., et al. Mesenchymal stem cell-derived extracellular vesicles attenuate kidney inflammation. *Kidney Int.* **92**,114-124 (2017).
24. Song, T.R., et al. Mesenchymal stem cell-derived extracellular vesicles induce regulatory T cells to ameliorate chronic kidney injury. *Hypertension* **75**, 1223-1232 (2020).
25. De Almeida D.C., et al. A Regulatory miRNA-mRNA Network Is Associated with Tissue Repair Induced by Mesenchymal Stromal Cells in Acute Kidney Injury. *Front. Immunol.* **7**, 645 (2017).
26. Gao, F., Zuo, B., Wang, Y., Li, S., Yang, J. & Sun, D. Protective function of exosomes from adipose tissue-derived mesenchymal stem cells in acute kidney injury through SIRT1 pathway. *Life Sci.* **255**, 117719 (2020).

27. Lindoso, R.S., et al. Adipose Mesenchymal Cells-Derived EVs Alleviate DOCA-Salt-Induced Hypertension by Promoting Cardio-Renal Protection. *Mol. Ther. Methods Clin. Dev.* **16**, 63-77 (2019).
28. Jin, J., et al. Exosome secreted from adipose-derived stem cells attenuates diabetic nephropathy by promoting autophagy flux and inhibiting apoptosis in podocyte. *Stem Cell Res.* **10**, 95 (2019).
29. Duan, Y., et al. Adipose mesenchymal stem cell-derived extracellular vesicles containing microRNA-26a-5p target TLR4 and protect against diabetic nephropathy. *J. Biol. Chem.* **295**, 12868-12884 (2020).
30. Van Koppen, A., et al. Human embryonic mesenchymal stem cell-derived conditioned medium rescues kidney function in rats with established chronic kidney disease. *PLoS One* **7**, e38746 (2012).
31. Zhang, K., et al. In vivo two-photon microscopy reveals the contribution of Sox9+ cell to kidney regeneration in a mouse model with extracellular vesicle treatment. *J. Biol. Chem.* **295**, 12203-12213 (2020).
32. Cantaluppi, V., et al. Microvesicles derived from endothelial progenitor cells protect the kidney from ischemia-reperfusion injury by microRNA-dependent reprogramming of resident renal cells. *Kidney Int.* **82**, 412-427 (2012).
33. Cantaluppi, V., et al. Endothelial progenitor cell-derived extracellular vesicles protect from complement-mediated mesangial injury in experimental anti-Thy1.1 glomerulonephritis. *Nephrol. Dial. Transplant.* **30**, 410-422 (2015).
34. Burger, D., et al. Human Endothelial Colony-Forming Cells Protect against Acute Kidney Injury Role of Exosomes. *Am. J. Pathol.* **185**, 2309-2323 (2015).
35. Viñas, J.L., et al. Transfer of microRNA-486-5p from human endothelial colony forming cell-derived exosomes reduces ischemic kidney injury. *Kidney Int.* **90**, 1238-1250 (2016).

36. Viñas, J.L., et al. Receptor-Ligand Interaction Mediates Targeting of Endothelial Colony Forming Cell-derived Exosomes to the Kidney after Ischemic Injury. *Sci. Rep.* **8**, 16320 (2018).
37. Yuan, X., et al. Extracellular vesicles from human-induced pluripotent stem cell-derived mesenchymal stromal cells (hiPSC-MSCs) protect against renal ischemia/reperfusion injury via delivering specificity protein (SP1) and transcriptional activating of sphingosine kinase 1 and inhibiting necroptosis. *Cell Death Dis.* **8**, 3200-3218 (2017).
38. Collino, F., et al. Extracellular Vesicles Derived from Induced Pluripotent Stem Cells Promote Renoprotection in Acute Kidney Injury Model. *Cells* **9**, 453 (2020).
39. Yu, L., et al. Embryonic stem cell-derived extracellular vesicles promote the recovery of kidney injury. *Stem Cell Res. Ther.* **12**, 379 (2021).
40. Dominguez, J.H., Liu, Y., Gao, H., Dominguez, J.M. 2nd., Xie, D. & Kelly, K.J. Renal Tubular Cell-Derived Extracellular Vesicles Accelerate the Recovery of Established Renal Ischemia Reperfusion Injury. *J. Am. Soc. Nephrol.* **28**, 3533-3544 (2017).
41. Grange, C., et al. Urinary Extracellular Vesicles Carrying Klotho Improve the Recovery of Renal Function in an Acute Tubular Injury Model. *Mol. Ther.* **28**, 490-502 (2020).
42. Jiang, Z.Z., et al. Exosomes secreted by human urine-derived stem cells could prevent kidney complications from type I diabetes in rats. *Stem Cell Res. Ther.* **7**, 24-37 (2016).
